# Supplementary material for: Coupled-cluster studies of the lowest excited states of the 11-cis-retinal chromophore
Source: Royal Society of Chemistry journal article supplement (doi:10.1039/b616137e), 2007-01-01
Supplement: b616137e.pdf [file b616137e.pdf]

## Supporting Information

### Coupled-Cluster Studies of the Lowest Excited States of the 11-*cis*-Retinal Chromophore

Robert Send

*Institut für Physikalische Chemie, Universität Karlsruhe,  
Kaiserstrasse 12, 76128 Karlsruhe, Germany*

Dage Sundholm\*

*Department of Chemistry, P.O. Box 55 (A.I. Virtanens plats 1),  
FIN-00014 University of Helsinki, Finland*

(Dated: 7th November 2006)

---

\*Electronic address: [sundholm@chem.helsinki.fi](mailto:sundholm@chem.helsinki.fi), FAX: +358-9-19150169, Phone: +358-9-19150176

Table I: The Cartesian coordinates (in Å) for the atoms of the protonated 11-*cis*-retinal chromophore optimized at the MP2/TZVP level.

|   |           |           |           |   |           |           |           |
|---|-----------|-----------|-----------|---|-----------|-----------|-----------|
| C | 4.277582  | -0.510163 | 0.609030  | H | 3.177516  | -2.187531 | 1.492036  |
| C | 5.240085  | 0.551888  | 1.144748  | H | 4.616834  | -1.695793 | 2.383560  |
| C | 5.545442  | 1.620921  | 0.112658  | H | 5.828351  | -1.950629 | 0.165235  |
| C | 4.264358  | 2.362511  | -0.230878 | H | 4.349701  | -2.222728 | -0.748322 |
| C | 3.097703  | 1.451050  | -0.504297 | H | 5.425478  | -0.903505 | -1.205631 |
| C | 3.097533  | 0.148931  | -0.102790 | H | 2.408122  | 2.731650  | -2.062072 |
| C | 3.768985  | -1.324571 | 1.803825  | H | 1.310470  | 1.385407  | -1.743450 |
| C | 5.011376  | -1.447754 | -0.357000 | H | 1.393868  | 2.758812  | -0.632899 |
| C | 1.984682  | 2.101534  | -1.278629 | H | 2.243798  | -1.760266 | -0.648377 |
| C | 1.985539  | -0.746237 | -0.358368 | H | 0.406599  | 0.529929  | 0.207227  |
| C | 0.668621  | -0.449451 | -0.179182 | H | 0.406632  | -2.658750 | -1.908807 |
| C | -0.407360 | -1.359582 | -0.422230 | H | 0.568718  | -3.251345 | -0.259197 |
| C | -0.100292 | -2.730849 | -0.945812 | H | -0.984899 | -3.343434 | -1.085589 |
| C | -1.687237 | -0.912215 | -0.143283 | H | -1.761295 | 0.101701  | 0.223251  |
| C | -2.859131 | -1.679044 | -0.273259 | H | -2.727122 | -2.740079 | -0.453020 |
| C | -4.178506 | -1.290504 | -0.115281 | H | -4.895400 | -2.103980 | -0.077909 |
| C | -4.736138 | 0.002664  | -0.037129 | H | -4.536162 | 2.077110  | -0.604429 |
| C | -3.919842 | 1.231283  | -0.313306 | H | -3.350547 | 1.520834  | 0.572138  |
| C | -6.091125 | 0.082059  | 0.290911  | H | -6.623226 | -0.847053 | 0.468030  |
| C | -6.808653 | 1.258855  | 0.414462  | H | -6.341764 | 2.221476  | 0.254241  |
| N | -8.090300 | 1.312842  | 0.749784  | H | -8.570063 | 2.194343  | 0.835392  |
| H | 6.154259  | 0.056341  | 1.482490  | H | -8.624442 | 0.474641  | 0.926336  |
| H | 4.789915  | 1.028837  | 2.022265  | H | 4.418144  | 3.009100  | -1.098389 |
| H | 5.960423  | 1.168497  | -0.790335 | H | 3.990217  | 3.029874  | 0.596651  |
| H | 6.293083  | 2.319661  | 0.491096  | H | -3.216407 | 1.045569  | -1.122841 |
| H | 3.151608  | -0.705136 | 2.457836  |   |           |           |           |

Table II: The Cartesian coordinates (in Å) for the atoms of the ground-state of the protonated 11-*cis*-retinal model chromophore optimized at the MP2/TZVP level.

|   |           |           |           |   |           |           |           |
|---|-----------|-----------|-----------|---|-----------|-----------|-----------|
| C | 4.740764  | -0.874351 | -0.571245 | C | -5.732993 | 0.095617  | -0.003319 |
| C | 6.029951  | -0.170279 | -0.162385 | C | -6.176092 | 1.395099  | -0.202436 |
| C | 5.900204  | 1.329192  | -0.401487 | N | -7.444641 | 1.771302  | -0.221610 |
| C | 4.817654  | 1.905660  | 0.505064  | H | 6.872091  | -0.584999 | -0.718547 |
| C | 3.585019  | 1.059214  | 0.521432  | H | 6.218572  | -0.350547 | 0.900671  |
| C | 3.519144  | -0.190184 | -0.000592 | H | 5.631043  | 1.503261  | -1.447994 |
| H | 4.750144  | -1.915252 | -0.234388 | H | 6.848803  | 1.836991  | -0.220880 |
| H | 4.661106  | -0.901576 | -1.663417 | H | 2.384980  | -2.034199 | 0.008234  |
| H | 2.708301  | 1.469224  | 1.017343  | H | 0.869250  | 0.637579  | -0.033440 |
| C | 2.287667  | -0.948961 | 0.028057  | H | -1.597199 | 0.233094  | 0.160017  |
| C | 1.020850  | -0.436185 | 0.022585  | H | -2.210651 | -2.798551 | 0.240897  |
| C | -0.113777 | -1.279481 | 0.093894  | H | -4.530127 | -2.292904 | 0.259494  |
| H | 0.061695  | -2.354019 | 0.105868  | H | -6.453462 | -0.699984 | 0.155724  |
| C | -1.412952 | -0.836256 | 0.159052  | H | -5.452900 | 2.188388  | -0.362582 |
| C | -2.483564 | -1.747797 | 0.175871  | H | -7.700333 | 2.736355  | -0.358906 |
| C | -3.839585 | -1.460748 | 0.176004  | H | -8.193002 | 1.108251  | -0.079307 |
| C | -4.376604 | -0.187042 | -0.020654 | H | 4.545912  | 2.919031  | 0.193027  |
| H | -3.696464 | 0.646126  | -0.184439 | H | 5.195288  | 2.001132  | 1.530810  |

Table III: The Cartesian coordinates (in Å) for the atoms of the first excited-state of the protonated 11-*cis*-retinal model chromophore optimized at the CC2/TZVP level.

|   |           |           |           |   |           |           |           |
|---|-----------|-----------|-----------|---|-----------|-----------|-----------|
| C | 4.782219  | -0.797983 | -0.528684 | C | -5.602816 | 0.224417  | 0.000296  |
| C | 5.992662  | 0.001092  | -0.057177 | C | -6.020875 | 1.540924  | -0.176125 |
| C | 5.777568  | 1.481832  | -0.346268 | N | -7.308434 | 1.930294  | -0.192812 |
| C | 4.597466  | 1.997669  | 0.471171  | H | 6.892598  | -0.368283 | -0.551666 |
| C | 3.437036  | 1.070844  | 0.464312  | H | 6.127869  | -0.144190 | 1.019756  |
| C | 3.480105  | -0.217222 | -0.034180 | H | 5.570937  | 1.616058  | -1.412832 |
| H | 4.845983  | -1.839081 | -0.198569 | H | 6.671632  | 2.061580  | -0.111633 |
| H | 4.753388  | -0.820515 | -1.625096 | H | 2.494299  | -2.121326 | -0.233670 |
| H | 2.513619  | 1.429975  | 0.915493  | H | 0.798675  | 0.425314  | 0.149423  |
| C | 2.323558  | -1.060247 | -0.055399 | H | -1.548393 | -0.007151 | 0.283962  |
| C | 1.012081  | -0.636543 | 0.039504  | H | -2.361918 | -3.012394 | 0.323478  |
| C | -0.103388 | -1.521685 | 0.005566  | H | -4.632718 | -2.245178 | 0.219293  |
| H | 0.086453  | -2.586348 | -0.115798 | H | -6.356798 | -0.540002 | 0.177158  |
| C | -1.389770 | -1.079036 | 0.178449  | H | -5.293197 | 2.328051  | -0.349899 |
| C | -2.544090 | -1.946255 | 0.224486  | H | -7.552058 | 2.907898  | -0.240153 |
| C | -3.843380 | -1.501648 | 0.139531  | H | -8.051179 | 1.277411  | 0.015538  |
| C | -4.264851 | -0.152654 | -0.070948 | H | 4.259642  | 2.981842  | 0.123537  |
| H | -3.520566 | 0.617906  | -0.261021 | H | 4.896894  | 2.155472  | 1.518923  |
